# Supplementary material
Source: PubMed Central journal article supplement (PMC8479584)
Supplement: jama-e2113827-s003.pdf [file jama-e2113827-s003.pdf]

## Supplemental Online Content

Lapergue B, Blanc R, Costalat V, et al. Effect of thrombectomy with combined contact aspiration and stent retriever vs stent retriever alone on revascularization in patients with acute ischemic stroke and large vessel occlusion: the ASTER2 randomized clinical trial. *JAMA*. doi:10.1001/jama.2021.13827

**eAppendix.** Definitions of eTICI and mRankin Score

**eMethods.** Interventions and Thrombectomy Procedure

**eTable 1.** Number of Patients Included Per Participating Center

**eTable 2.** Procedural Details (in Analyzed Population After at Least 1 Device Pass)

**eTable 3.** Detail of Thrombectomy Devices Used in Frontline and Rescue Strategies According to the Assigned Groups

**eTable 4.** Data on Angiographic and Clinical Outcomes on the Rescue Therapy Group

**eTable 5.** Primary and Secondary Efficacy Outcomes in Per-Protocol Population

**eTable 6.** Primary and Secondary Reperfusion Outcomes in Complete Case Analysis

**eTable 7.** Primary and Secondary Reperfusion Outcomes in Multiple-Imputation Analysis

**eFigure 1.** Cumulative Incidence of All-Cause Mortality During the 12-Month Follow-up Period

**eFigure 2.** Treatment Effect Size (First-Line CA/SR Thrombectomy vs First-Line SR Alone Thrombectomy) on Primary Outcome According to Key Subgroups

**eFigure 3.** Conditional Studentized Residuals of Linear Mixed Models (Including the Constrained Longitudinal Data Analysis) for Secondary Quantitative Outcomes

**eFigure 4.** Schoenfeld Residuals Plot for Treatment Group Derived From the Cox Regression Model of 12-Month All-Cause Mortality

This supplemental material has been provided by the authors to give readers additional information about their work.

## **eAppendix. Definitions of eTICI and mRankin Score**

- **Expanded thrombolysis in cerebral infarction (eTICI): Liebeskind DS, et al. J NeuroIntervent Surg 2018;0:1–7.**

This 7-point compilation of TICI grades, termed the expanded TICI (eTICI), reflects all previously reported thresholds used to

define reperfusion after endovascular stroke therapy.

In brief, eTICI grade 0 is equivalent to no reperfusion or 0% filling of the downstream territory; eTICI 1 reflects thrombus reduction without any reperfusion of distal arteries; eTICI 2a is reperfusion in less than half or 1–49% of the territory; eTICI 2b50 is 50–66% reperfusion, exceeding the modified TICI (mTICI) 2B threshold but below the original TICI 2B cut-off point; eTICI 2b67 is 67–89% reperfusion, exceeding mTICI but below TICI2C; eTICI 2c is equivalent to TICI 2C or 90–99% reperfusion (near total); and eTICI 3 is total or 100% reperfusion, tantamount to TICI 3.

In the ASTER2 trial, we chose to combine the eTICI2b67 and eTICI2b50 levels into a single category named eTICI2b50.

- **modified Rankin Score: Bamford JM, et al. J. Stroke. 1989 Jun;20(6):828.**

0 No symptoms at all

1 No significant disability despite symptoms; able to carry out all usual duties and activities.

2 Slight disability; unable to carry out all previous activities, but able to look after own affairs without assistance.

3 Moderate disability; requiring some help, but able to walk without assistance.

4 Moderately severe disability; unable to walk without assistance and unable to attend to own bodily needs without assistance.

5 Severe disability; bedridden, incontinent and requiring constant nursing care and attention.

6 Dead.

## **eMethods. Interventions and Thrombectomy Procedure**

*Experimental group “Combined contact aspiration/stent retriever Technique” (8-10,16)*

The combined contact aspiration/stent retriever approach was performed, as in standard care, using a balloon-guide catheter. A 0.021-to-0.027-inch inner lumen microcatheter, with a 0.014-to-0.016-inch microwire inside, was introduced into a large-bore aspiration catheter and this construct was introduced into the balloon-guide catheter as a unit. The balloon-guide catheter was placed at the origin of the cervical intracranial carotid artery. The microcatheter was then advanced past the thrombus over the microwire to allow deployment of the stent-retriever as in the control group. The stent retriever (Any CE-marked device) was then deployed beyond the occlusion. After deployment of the stent retriever, the large bore distal access catheter was advanced to contact the proximal edge of the stent retriever. Then, the aspiration pump was connected to the large bore distal access catheter. After at least 90 sec of aspiration, the stent retriever and the large bore distal access catheter were pulled out as a unit from the balloon-guide catheter and from the patient. Manual aspiration was also applied to the balloon-guide catheter during the pull-out maneuver, which was performed after the temporary inflation of the balloon at the tip of the balloon-guide catheter to ensure carotid flow arrest.

This process was repeated until successful reperfusion (eTICI 2c/3) was achieved or the procedure terminated. At least three attempts were made before switching to another adjunctive device. A revascularization score was recorded after each device attempt.

*Control group « standard stent retriever technique”:*

The technique used was in accordance with the device instruction for use. A large bore balloon guide catheter was placed at the origin of the cervical ICA. A suitable delivery microcatheter was navigated over a microwire into the occluded MCA and across the occlusion. A control super-selective angiogram was used to document the extent of occlusion and thrombus. The stent retriever (Any CE-marked device) was then deployed across the occlusion. After at least 90 seconds, withdrawal was performed with proximal occlusion by inflation of the balloon guide catheter. This process was repeated until successful reperfusion (eTICI 2c/3) was achieved, or the procedure terminated. At least three attempts were made before switching to another adjunctive device. A revascularization score was recorded after each device attempt.

**eTable 1.** Number of Patients Included Per Participating Center

|             | <b>Overall</b> | <b>Date of first<br/>enrolled<br/>patient</b> | <b>First-line<br/>CA/SR<br/>thrombectomy</b> | <b>First-line SR<br/>alone<br/>thrombectomy</b> |
|-------------|----------------|-----------------------------------------------|----------------------------------------------|-------------------------------------------------|
| Center n°1  | 71             | 2017/10/16                                    | 36                                           | 35                                              |
| Center n°2  | 120            | 2017/10/17                                    | 61                                           | 59                                              |
| Center n°3  | 33             | 2017/11/28                                    | 17                                           | 16                                              |
| Center n°4  | 54             | 2017/12/02                                    | 26                                           | 28                                              |
| Center n°5  | 16             | 2017/11/24                                    | 8                                            | 8                                               |
| Center n°6  | 30             | 2017/11/18                                    | 15                                           | 15                                              |
| Center n°7  | 38             | 2017/12/01                                    | 20                                           | 18                                              |
| Center n°8  | 16             | 2018/02/07                                    | 8                                            | 8                                               |
| Center n°9  | 22             | 2018/02/09                                    | 11                                           | 11                                              |
| Center n°10 | 5              | 2018/04/25                                    | 2                                            | 3                                               |
| Center n°11 | 3              | 2018/02/06                                    | 1                                            | 2                                               |

Abbreviations: CA=contact aspiration; SR=stent retriever.

**eTable 2.** Procedural Details (in Analyzed Population After at Least 1 Device Pass <sup>a</sup>)

| Procedural characteristics                                              | First allocated Contact aspiration /Stent retriever thrombectomy (N=185) | First allocated Stent retriever thrombectomy(N=181) |
|-------------------------------------------------------------------------|--------------------------------------------------------------------------|-----------------------------------------------------|
| First-line strategy                                                     |                                                                          |                                                     |
| Allocated group                                                         | 184/185 (99.5)                                                           | 181/181 (100.0)                                     |
| Balloon guide catheter use                                              | 176/185 (95.1)                                                           | 164/181 (90.6)                                      |
| Number of passes                                                        |                                                                          |                                                     |
| 1                                                                       | 94/185 (50.8)                                                            | 81/181 (44.8)                                       |
| 2                                                                       | 43/185 (23.2)                                                            | 42/181 (23.2)                                       |
| 3                                                                       | 48/185 (26.0)                                                            | 58/181 (32.0)                                       |
| Second-line strategy                                                    | 39/185 (21.1)                                                            | 54/181 (29.8)                                       |
| Contact aspiration alone                                                | 11/185 (6.0)                                                             | 9/181 (5.0)                                         |
| Stent retriever alone                                                   | 3/185 (1.6)                                                              | 2/181 (1.1)                                         |
| Contact aspiration and Stent retriever                                  | 25/185 (13.5)                                                            | 42/181 (23.2)                                       |
| Others                                                                  | 0/185 (0.0)                                                              | 1/181 (0.6) <sup>b</sup>                            |
| Number of passes                                                        |                                                                          |                                                     |
| 1                                                                       | 15/185 (8.1)                                                             | 15/181 (8.3)                                        |
| 2                                                                       | 13/185 (7.0)                                                             | 21/181 (11.6)                                       |
| 3                                                                       | 4/185 (2.2)                                                              | 7/181 (3.9)                                         |
| 4-5                                                                     | 4/185 (2.2)                                                              | 7/181 (3.9)                                         |
| 6-13                                                                    | 3/185 (1.6)                                                              | 4/181 (2.2)                                         |
| Time from arterial puncture to clot contact                             | 23 (17 to 34)                                                            | 22 (17 to 32)                                       |
| Time from arterial puncture to maximal recanalization (procedural time) | 47 (30 to 72)                                                            | 50 (32 to 77)                                       |

<sup>a</sup> data among randomized patients after at least one thrombectomy device pass (excluding patients with spontaneous clot revascularization (n=30), intracranial access failure (n=6) and the 3 cases who did not receive any device pass) and after exclusion for legal reasons of the 3 patients (see flow chart, one allocated to SR group but treated by combination first-line CA/SR) <sup>b</sup> Recanalization with a micro guidewire.

Abbreviations: CA=contact aspiration; SR=stent retriever.

**eTable 3.** Detail of Thrombectomy Devices Used in Frontline and Rescue Strategies According to the Assigned Groups

| Devices                             | <u>Used in Stent Retriever Group</u> |                 | <u>Used in Combination of Stent retriever and Contact aspiration Group</u> |                 |
|-------------------------------------|--------------------------------------|-----------------|----------------------------------------------------------------------------|-----------------|
|                                     | Initial strategy                     | Rescue strategy | Initial strategy                                                           | Rescue strategy |
| <b>Balloon guide catheters</b>      |                                      |                 |                                                                            |                 |
| Merci 8F                            | 4                                    | 1               | 3                                                                          | 0               |
| Merci 9F                            | 64                                   | 15              | 67                                                                         | 10              |
| Floxgate 2 8F                       | 26                                   | 10              | 28                                                                         | 6               |
| Cello 8 F                           | 11                                   | 2               | 3                                                                          | 0               |
| Cello 9F                            | 63                                   | 20              | 79                                                                         | 13              |
| <b>Stent Retrievers</b>             |                                      |                 |                                                                            |                 |
| Trevo 4                             | 31                                   | 10              | 43                                                                         | 7               |
| Trevo 6                             | 17                                   | 5               | 18                                                                         | 0               |
| Solitaire 4*20                      | 51                                   | 11              | 52                                                                         | 10              |
| Solitaire 6*30                      | 47                                   | 13              | 40                                                                         | 5               |
| Eric                                | 14                                   | 4               | 13                                                                         | 5               |
| Embotrap                            | 3                                    | 0               | 2                                                                          | 0               |
| Preset                              | 6                                    | 1               | 8                                                                          | 1               |
| Solitaire4*40                       | 1                                    | 2               | 3                                                                          | 0               |
| Solitaire 6*40                      | 3                                    | 1               | 2                                                                          | 0               |
| Solitaire6*24                       | 1                                    | 1               | 2                                                                          | 0               |
| Solitaire 6*20                      | 2                                    | 0               | 1                                                                          | 0               |
| Trevo 3                             | 2                                    | 0               | 0                                                                          | 1               |
| Trevo 3*20                          | 2                                    | 0               | 3                                                                          | 0               |
| Trevo 4*20                          | 1                                    | 0               | 0                                                                          | 0               |
| Vesalio Neva                        | 1                                    | 0               | 2                                                                          | 1               |
| Catchmini                           | 0                                    | 0               | 1                                                                          | 0               |
| Catchmaxi6*30                       | 0                                    | 1               | 1                                                                          | 1               |
| Tigertriever                        | 0                                    | 1               | 0                                                                          | 0               |
| <b>Contact Aspiration catheters</b> |                                      |                 |                                                                            |                 |
| ACE 64                              | 0                                    | 1               | 1                                                                          | 0               |
| ACE60                               | 0                                    | 4               | 1                                                                          | 1               |
| ACE 68                              | 6                                    | 17              | 84                                                                         | 9               |
| 3 max                               | 0                                    | 5               | 1                                                                          | 7               |
| 4 max                               | 0                                    | 2               | 2                                                                          | 1               |
| 5 Max                               | 0                                    | 0               | 2                                                                          | 0               |
| Sofia 5F                            | 2                                    | 17              | 37                                                                         | 12              |
| Sofia 6Fplus                        | 8                                    | 8               | 42                                                                         | 8               |
| Arc                                 | 0                                    | 0               | 11                                                                         | 0               |
| Navien 072                          | 0                                    | 0               | 1                                                                          | 0               |
| Catalyst 6F                         | 0                                    | 2               | 8                                                                          | 3               |
| Catalyst 5F                         | 0                                    | 0               | 2                                                                          | 0               |

**eTable 4.** Primary and Secondary Efficacy Outcomes in Per-Protocol Population

|                                                                    | First allocated contact aspiration/stent retriever thrombectomy (N=167) | First allocated stent retriever thrombectomy (N=146) | Adjusted odds ratio (95%CI)        | P-Value |
|--------------------------------------------------------------------|-------------------------------------------------------------------------|------------------------------------------------------|------------------------------------|---------|
| <b>Primary efficacy outcome</b>                                    |                                                                         |                                                      |                                    |         |
| Reperfusion (eTICI 2c/3) at the end of procedures                  | 110 (65.9)                                                              | 88 (60.3)                                            | 1.26 (0.79 to 2.02)                | 0.32    |
| <b>Secondary angiographic efficacy outcomes</b>                    |                                                                         |                                                      |                                    |         |
| Reperfusion outcomes at the end of procedures                      |                                                                         |                                                      |                                    |         |
| eTICI 2b50/2c/3                                                    | 152 (91.0)                                                              | 130 (89.0)                                           | 1.28 (0.59 to 2.76)                | 0.53    |
| eTICI 3                                                            | 47 (28.1)                                                               | 36 (24.7)                                            | 1.20 (0.72 to 2.01)                | 0.48    |
| Reperfusion outcomes after the assigned initial intervention alone |                                                                         |                                                      |                                    |         |
| eTICI 2b50/2c/3                                                    | 144 (86.2)                                                              | 111 (76.0)                                           | 2.07 (1.12 to 3.78)                | 0.019   |
| eTICI 2c/3                                                         | 104 (62.3)                                                              | 76 (52.1)                                            | 1.51 (0.95 to 2.38)                | 0.078   |
| eTICI 3                                                            | 46 (27.5)                                                               | 31 (21.3)                                            | 1.42 (0.83 to 2.40)                | 0.19    |
| First pass effect (eTICI 2c/3 after first pass)                    | 67 (40.1)                                                               | 47 (32.2)                                            | 1.41 (0.88 to 2.26)                | 0.15    |
| Modified First Pass Effect (eTICI 2b50/2c/3 after first pass)      | 88 (52.7)                                                               | 64 (43.8)                                            | 1.44 (0.91 to 2.28)                | 0.11    |
| eTICI 3 after first pass                                           | 33 (19.8)                                                               | 18 (12.3)                                            | 1.77 (0.94 to 3.32)                | 0.075   |
| Use of rescue treatment                                            | 31 (18.6)                                                               | 45 (30.8)                                            | 0.49 (0.28 to 0.85)                | 0.011   |
| Arterial puncture to eTICI 2c/3 <sup>a</sup>                       |                                                                         |                                                      |                                    |         |
| Median (IQR)                                                       | 42 (28 to 58) [n=110]                                                   | 43 (28 to 59) [n=88]                                 |                                    |         |
| Mean (95%CI) <sup>b</sup>                                          | 3.80 (3.65 to 3.94)                                                     | 3.75 (3.59 to 3.91)                                  | 0.044 (-0.10 to 0.19) <sup>c</sup> | 0.54    |
| Clot contact to maximal reperfusion <sup>d</sup>                   |                                                                         |                                                      |                                    |         |
| Median (IQR)                                                       | 16 (8 to 37) [n=165]                                                    | 20 (10 to 44) [n=143]                                |                                    |         |
| Mean (95%CI) <sup>b</sup>                                          | 3.02 (2.81 to 3.23)                                                     | 3.15 (2.93 to 3.37)                                  | -0.13 (-0.35 to 0.09) <sup>c</sup> | 0.23    |
| <b>Clinical efficacy outcomes</b>                                  |                                                                         |                                                      |                                    |         |
| Change in NIHSS score at 24 hours, mean (95%CI) <sup>e</sup>       | -3.5 (-5.2 to -1.9) [n=159]                                             | -3.3 (-4.8 to -1.7) [n=142]                          | -0.2 (-2.0 to 2.5) <sup>c</sup>    | 0.82    |
| Functional independence <sup>f</sup>                               |                                                                         |                                                      |                                    |         |
| at 3 months                                                        | 61/160 (38.1)                                                           | 62/142 (43.7)                                        | 0.80 (0.49 to 1.30)                | 0.36    |

|                                                       |                       |                          |                                    |      |
|-------------------------------------------------------|-----------------------|--------------------------|------------------------------------|------|
| at 12 months                                          | 60/145 (41.4)         | 54/130 (41.5)            | 1.03 (0.61 to 1.72)                | 0.91 |
| Modified Rankin Scale                                 |                       |                          |                                    |      |
| at 3 months, median (IQR)                             | 3.5 (1 to 6) [n=160]  | 3 (2 to 5) [n=142]       | 0.97 (0.64 to 1.46) <sup>g</sup>   | 0.87 |
| at 12 months, median (IQR)                            | 4 (1 to 6) [n=145]    | 3 (1 to 6) [n=130]       | 0.95 (0.60 to 1.47) <sup>g</sup>   | 0.80 |
| EQ-5D utility index score at 12 months <sup>h</sup>   |                       |                          |                                    |      |
| Median (IQR)                                          | 0 (0 to 0.75) [n=151] | 0.27 (0 to 0.80) [n=132] |                                    |      |
| Mean (95%CI)                                          | 0.33 (0.24 to 0.43)   | 0.37 (0.27 to 0.47)      | -0.04 (-0.13 to 0.06) <sup>c</sup> | 0.46 |
| EQ-5D visual analogue scale at 12 months <sup>i</sup> | 70 (64 to 77) [n=75]  | 64 (58 to 71) [n=78]     | 5.88 (-0.91 to 12.68) <sup>c</sup> | 0.09 |

Values expressed as n (%), unless otherwise stated. Effect sizes were calculated after adjustment for randomization stratification variables (center, age (<70 vs. ≥70 years), intravenous thrombolysis and occlusion site (isolated MCA versus tandem MCA and ICA)).

<sup>a</sup> data among patients with near total/total reperfusion after at least one device pass, <sup>b</sup> calculated after log-transformation of values, <sup>c</sup> difference in means, <sup>d</sup> data among patients after at least one device pass, <sup>e</sup> additional adjustment on baseline NIHSS score, <sup>f</sup> modified Rankin scale score ≤2 (the modified Rankin Scale measures the degree of disability; score ranges from 0 (symptom free) to 6 (dead)), <sup>g</sup> common adjusted odds ratio of improvement of 1 point in Modified Rankin Scale score, <sup>h</sup> treating death with EQ-5D utility index score=0, <sup>i</sup> data among patients alive at 12-months.

Abbreviations: CI=confidence interval; ICA=internal carotid artery; IQR=interquartile range; MCA=middle cerebral artery; eTICI= Expanded Treatment in Cerebral Infarction Score; NIHSS=National Institutes of Health Stroke Scale.



**eTable 5.** Primary and Secondary Reperfusion Outcomes in Complete Case-Analysis

|                                                                    | <b>First allocated contact aspiration/stent retriever thrombectomy</b> | <b>First allocated stent retriever thrombectomy</b> | <b>Adjusted odds ratio (95%CI)</b> | <b>P-Value</b> |
|--------------------------------------------------------------------|------------------------------------------------------------------------|-----------------------------------------------------|------------------------------------|----------------|
| <b>Primary efficacy outcome</b>                                    |                                                                        |                                                     |                                    |                |
| Reperfusion (eTICI 2c/3) at the end of procedures                  | 114/180 (63.3)                                                         | 102/174 (58.6)                                      | 1.21 (0.78 to 1.87)                | 0.38           |
| <b>Secondary angiographic efficacy outcomes</b>                    |                                                                        |                                                     |                                    |                |
| Reperfusion outcomes at the end of procedures                      |                                                                        |                                                     |                                    |                |
| eTICI 2b50/2c/3                                                    | 163/180 (90.6)                                                         | 155/174 (89.1)                                      | 1.21 (0.59 to 2.46)                | 0.60           |
| eTICI 3                                                            | 49/190 (27.2)                                                          | 41/174 (23.6)                                       | 1.21 (0.74 to 1.96)                | 0.44           |
| Reperfusion outcomes after the assigned initial intervention alone |                                                                        |                                                     |                                    |                |
| eTICI 2b50/2c/3                                                    | 159/185 (86.0)                                                         | 130/175 (74.3)                                      | 2.17 (1.25 to 3.76)                | 0.006          |
| eTICI 2c/3                                                         | 105/185 (56.8)                                                         | 85/175 (48.6)                                       | 1.38 (0.90 to 2.11)                | 0.13           |
| eTICI 3                                                            | 46/185 (24.9)                                                          | 35/175 (20.0)                                       | 1.33 (0.80 to 2.20)                | 0.27           |
| First pass effect (eTICI 2c/3 after first pass)                    | 67/185 (36.2)                                                          | 53/175 (30.3)                                       | 1.31 (0.84 to 2.04)                | 0.23           |
| Modified First Pass Effect (eTICI 2b50/2c/3 after first pass)      | 93/185 (50.3)                                                          | 75/175 (42.9)                                       | 1.36 (0.89 to 2.07)                | 0.15           |
| eTICI 3 after first pass                                           | 33/185 (17.8)                                                          | 21/175 (12.0)                                       | 1.60 (0.88 to 2.92)                | 0.12           |

Values expressed as n (%), unless otherwise stated. Effect sizes were calculated after adjustment for randomization stratification variables (center, age (<70 vs. ≥70 years), intravenous thrombolysis and occlusion site (isolated MCA versus tandem MCA and /ICA)) by restricting analysis to patients with post-baseline eTICI evaluation by the core-laboratory.

Abbreviations: CI=confidence interval; ICA=internal carotid artery; IQR=interquartile range; MCA=middle cerebral artery; eTICI= Expanded Treatment in Cerebral Infarction Score; NIHSS=National Institutes of Health Stroke Scale.

**eTable 6.** Primary and Secondary Reperfusion Outcomes in Multiple-Imputation Analysis

|                                                                    | <b>First allocated contact aspiration/stent retriever thrombectomy (N=203)</b> | <b>First allocated stent retriever thrombectomy (N=202)</b> | <b>Adjusted odds ratio (95%CI)</b> | <b>P-Value</b> |
|--------------------------------------------------------------------|--------------------------------------------------------------------------------|-------------------------------------------------------------|------------------------------------|----------------|
| <b>Primary efficacy outcome</b>                                    |                                                                                |                                                             |                                    |                |
| Reperfusion (eTICI 2c/3) at the end of procedures                  | 128 (63.2)                                                                     | 117 (57.9)                                                  | 1.25 (0.80 to 1.95)                | 0.32           |
| <b>Secondary angiographic efficacy outcomes</b>                    |                                                                                |                                                             |                                    |                |
| Reperfusion outcomes at the end of procedures                      |                                                                                |                                                             |                                    |                |
| eTICI 2b50/2c/3                                                    | 182 (89.9)                                                                     | 179 (88.5)                                                  | 1.18 (0.56 to 2.48)                | 0.66           |
| eTICI 3                                                            | 56 (27.6)                                                                      | 48 (23.7)                                                   | 1.23 (0.76 to 1.99)                | 0.39           |
| Reperfusion outcomes after the assigned initial intervention alone |                                                                                |                                                             |                                    |                |
| eTICI 2b50/2c/3                                                    | 174 (85.6)                                                                     | 151 (74.8)                                                  | 2.07 (1.18 to 3.62)                | 0.01           |
| eTICI 2c/3                                                         | 115 (56.8)                                                                     | 99 (48.9)                                                   | 1.39 (0.91 to 2.13)                | 0.13           |
| eTICI 3                                                            | 52 (25.4)                                                                      | 41 (20.2)                                                   | 1.34 (0.82 to 2.20)                | 0.24           |
| First pass effect (eTICI 2c/3 after first pass)                    | 76 (37.5)                                                                      | 62 (30.7)                                                   | 1.38 (0.89 to 2.13)                | 0.15           |
| Modified First Pass Effect (eTICI 2b50/2c/3 after first pass)      | 106 (52.3)                                                                     | 88 (43.4)                                                   | 1.45 (0.96 to 2.18)                | 0.07           |
| eTICI 3 after first pass                                           | 38 (18.9)                                                                      | 25 (12.4)                                                   | 1.66 (0.93 to 2.96)                | 0.09           |

Values expressed as n (%), unless otherwise stated. Effect sizes were calculated after adjustment for randomization stratification variables (center, age (<70 vs. ≥70 years), intravenous thrombolysis and occlusion site (isolated MCA versus tandem MCA and /ICA)) after handling missing values in post-baseline eTICI evaluation by the core-laboratory using multiple imputation procedures (m=10). Missing data were imputed under the missing at random assumption (MAR), using the regression switching approach (chained equation) with a predictive mean matching method for quantitative variables, logistic regression models (binomial, ordinal or multinomial) for categorical variables. The imputation procedure was performed using all baseline characteristics (see Table 1) and the treatment group. Treatment effect estimates obtained in multiple imputed data sets were combined using the Rubin's rules.

Abbreviations: CI=confidence interval; ICA=internal carotid artery; IQR=interquartile range; MCA=middle cerebral artery; eTICI= Expanded Treatment in Cerebral Infarction Score; NIHSS=National Institutes of Health Stroke Scale.

**eTable 7.** Data on Angiographic and Clinical Outcomes on the Rescue Therapy Group

|                                        | <b>First allocated Contact aspiration /Stent retriever thrombectomy</b> | <b>First allocated Stent retriever thrombectomy</b> |
|----------------------------------------|-------------------------------------------------------------------------|-----------------------------------------------------|
| Rescue therapy                         | 39/185 (21.1)                                                           | 54/181 (29.8)                                       |
| Contact aspiration alone               | 11/185 (6.0)                                                            | 9/181 (5.0)                                         |
| Stent retriever alone                  | 3/185 (1.6)                                                             | 2/181 (1.1)                                         |
| Contact aspiration and Stent retriever | 25/185 (13.5)                                                           | 42/181 (23.2)                                       |
| Per procedural complications,          | 3 (7.69)                                                                | 4 (7.41)                                            |
| eTICI 3 at end of procedure            | 4(10.26)                                                                | 6(11.11)                                            |
| eTICI 2c/3 at end of procedure         | 13(33.33)                                                               | 18(33.33)                                           |
| eTICI 2b50/2c/3 at end of procedure    | 25(64.10)                                                               | 37(68.52)                                           |
| modified Rankin Score 0-2 (3 months)   | 10(25.64)                                                               | 17(32.08)                                           |
| Death (3 months)                       | 15(38.46)                                                               | 19(35.85)                                           |

**eFigure 1.** Cumulative Incidence of All-Cause Mortality During the 12-Month Follow-up Period

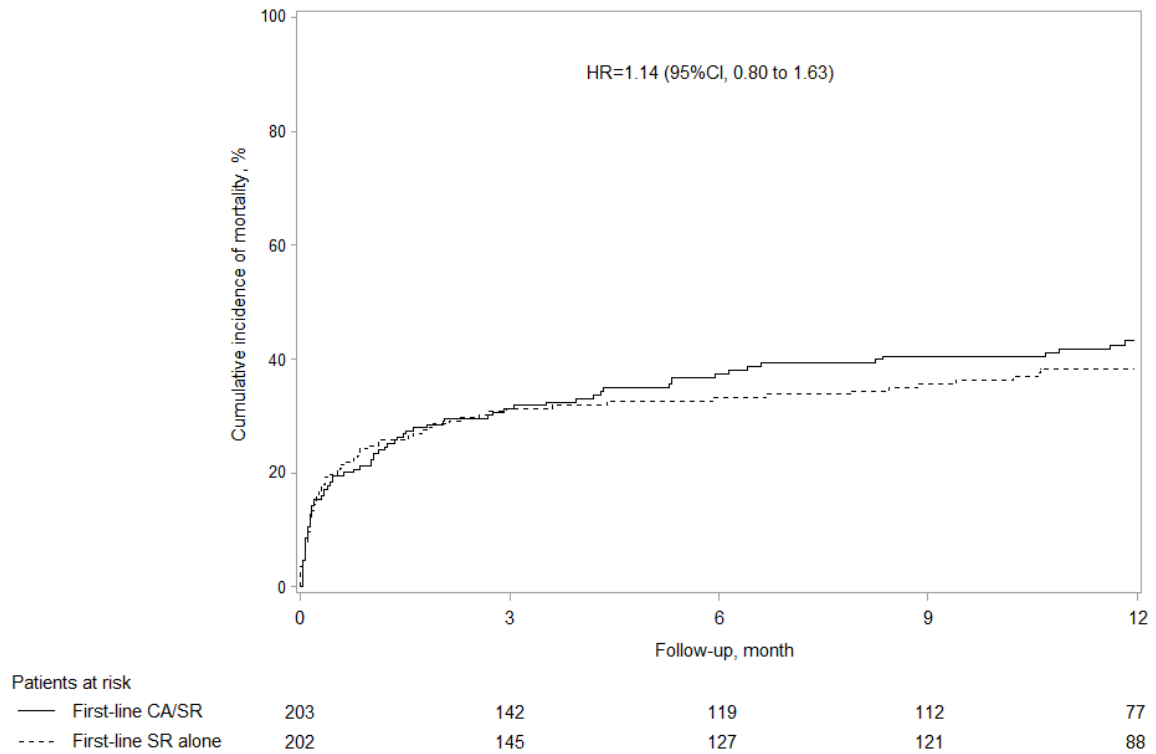

Hazard ratio (95% Confidence interval) for first allocated CA/SR vs. R-alone calculated using Cox's proportional hazard model adjusted for randomization stratification variables (center, age (<70 vs. ≥70 years), IV thrombolysis and occlusion site (isolated MCA versus tandem MCA and /ICA)) is reported. Abbreviations: CA=contact aspiration, ICA=internal carotid artery; IV=intravenous; MCA=middle cerebral artery; SR=stent retriever

**eFigure 2.** Treatment Effect Size (First Allocated Contact Aspiration and Stent Retriever Thrombectomy vs First Allocated Stent Retriever Alone Thrombectomy) on Primary Outcome According to Key Subgroups

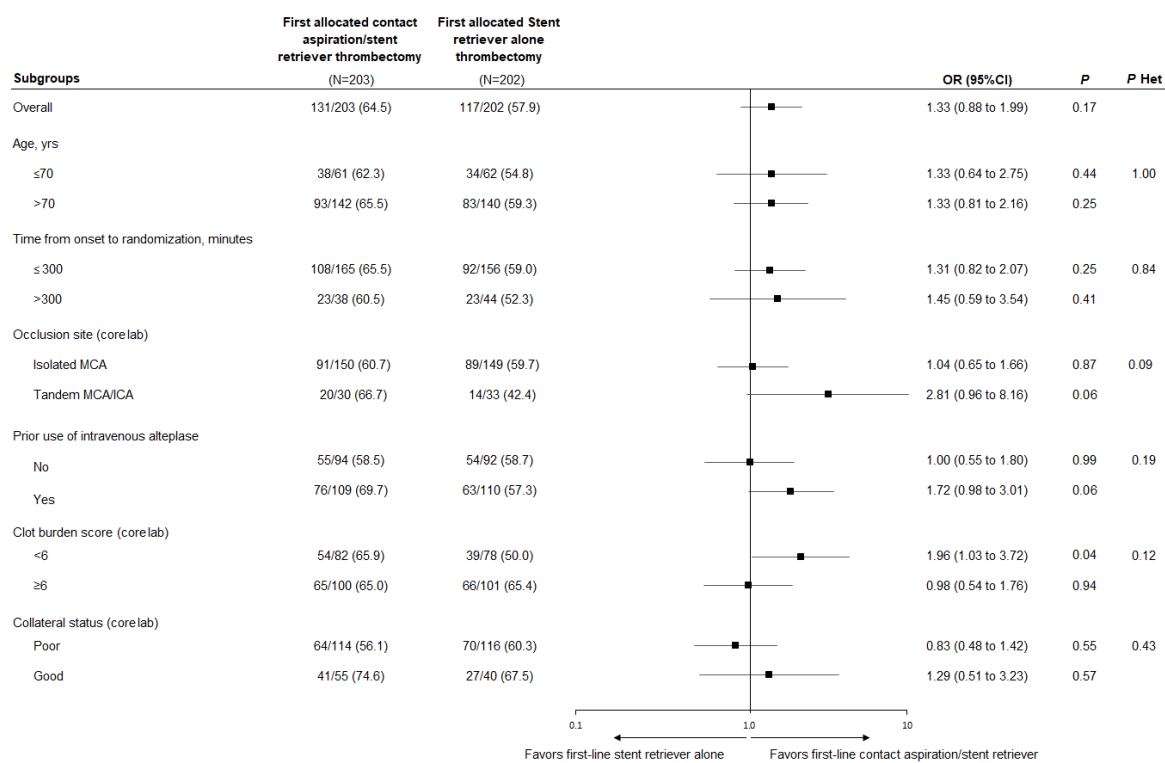

P het indicates *P*-Values for heterogeneity test.

Abbreviations: CI=confidence interval; ICA=internal carotid artery; MCA=middle cerebral artery; OR=adjusted odds ratio.

### eFigure 3. Conditional Studentized Residuals of Linear Mixed Models (Including the Constrained Longitudinal Data Analysis) for Secondary Quantitative Outcomes

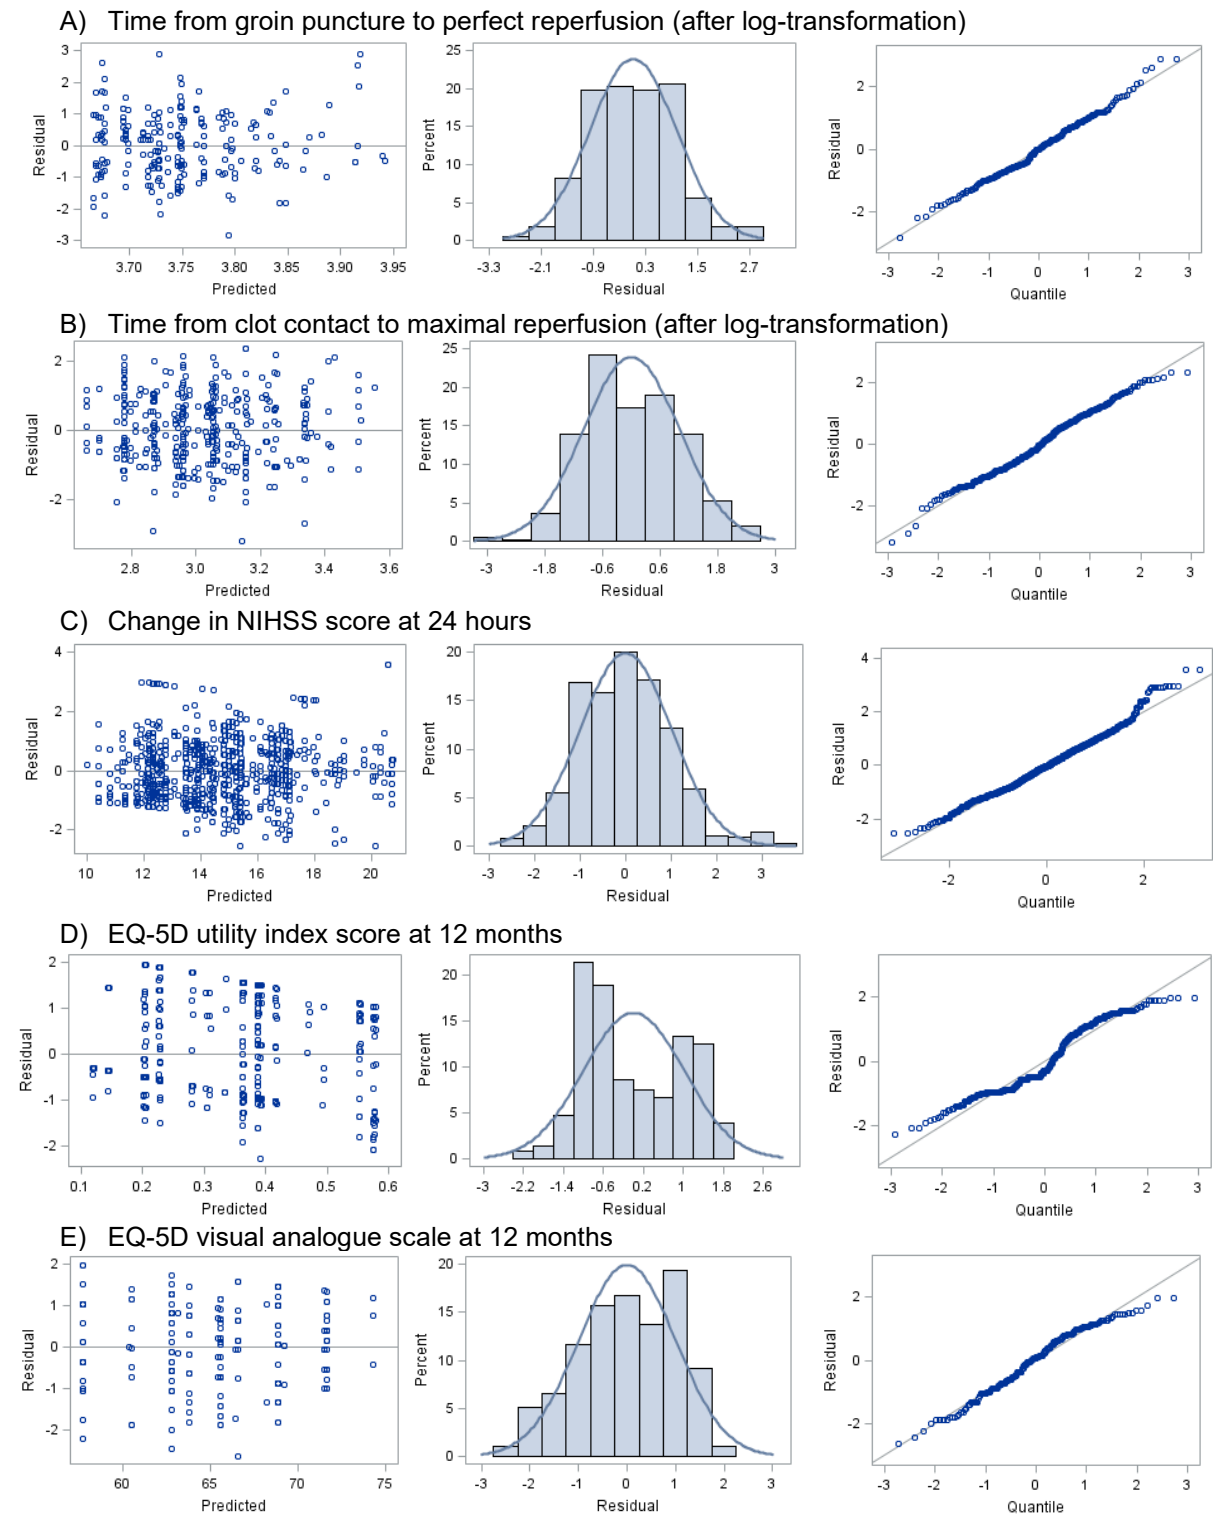

**eFigure 4.** Schoenfeld Residuals Plot for Treatment Group Derived From the Cox Regression Model of 12-Month All-Cause Mortality

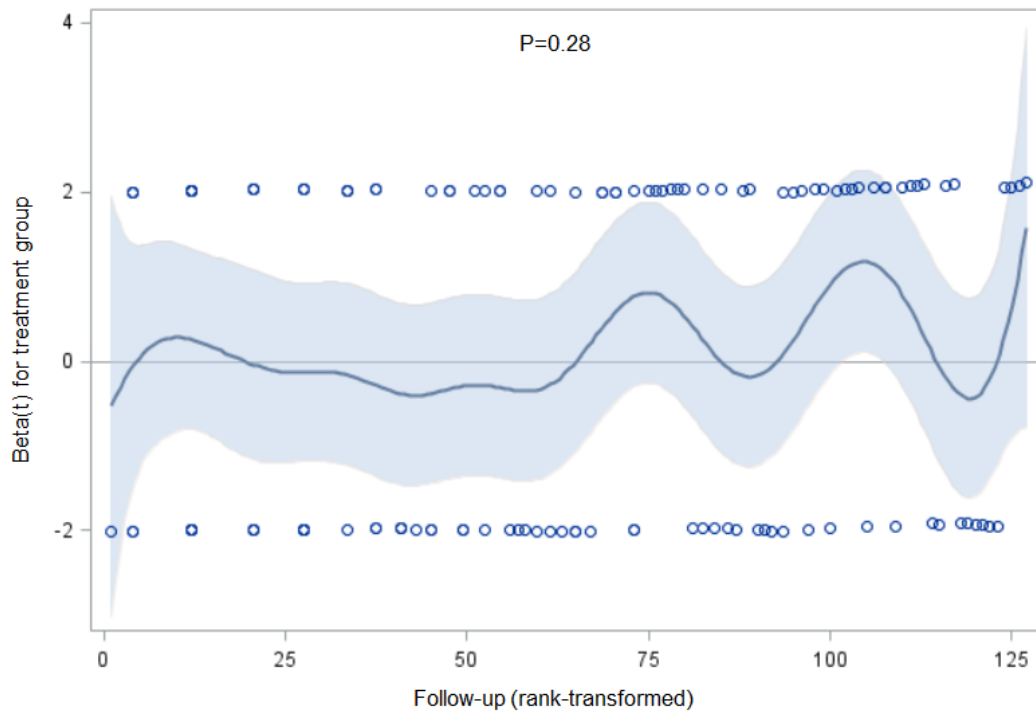

Solid line indicates the fitted penalized B-spline curves with 95% confidence interval (bands). The Schoenfeld residuals are shown to have mean zero under the proportional hazard assumption; P-value from the correlation test is reported and did not reject the proportional hazard assumption.
