# Supplementary material
Source: PubMed Central journal article supplement (PMC8479584)
Supplement: jama-e2113827-s004.pdf [file jama-e2113827-s004.pdf]

\*Indicates required information. Only first name, last name, and suffix will appear in PubMed.

| <b>*Group Name(s): ASTER2 trial investigators</b> |                   |                              |                         |                                                      |                                                 |                                                                |                                                                                                   |
|---------------------------------------------------|-------------------|------------------------------|-------------------------|------------------------------------------------------|-------------------------------------------------|----------------------------------------------------------------|---------------------------------------------------------------------------------------------------|
| <b>*First Name and Middle Initial(s)</b>          | <b>*Last Name</b> | <b>*Suffix (eg, Jr, III)</b> | <b>Academic Degrees</b> | <b>Institution</b>                                   | <b>Location (city, state/province, country)</b> | <b>Role or Contribution, eg, chair, principal investigator</b> | <b>Group (if more than 1 Group listed in the byline) and/or Subgroup (eg, Steering Committee)</b> |
| Michel                                            | Piotin            |                              |                         | Department of Interventional Neuroradiology          | Rothschild Foundation, Paris, France,           |                                                                |                                                                                                   |
| Raphael                                           | Blanc             |                              |                         | Department of Interventional Neuroradiology          | Rothschild Foundation, Paris, France,           |                                                                |                                                                                                   |
| Hocine                                            | Redjem            |                              |                         | Department of Interventional Neuroradiology          | Rothschild Foundation, Paris, France,           |                                                                |                                                                                                   |
| Gabriele                                          | Ciccio            |                              |                         | Department of Interventional Neuroradiology          | Rothschild Foundation, Paris, France,           |                                                                |                                                                                                   |
| Stanislas                                         | Smajda            |                              |                         | Department of Interventional Neuroradiology          | Rothschild Foundation, Paris, France,           |                                                                |                                                                                                   |
| Mikael                                            | Mazighi           |                              |                         | Department of Interventional Neuroradiology          | Rothschild Foundation, Paris, France,           |                                                                |                                                                                                   |
| Robert                                            | Fahed             |                              |                         | Department of Interventional Neuroradiology          | Rothschild Foundation, Paris, France,           |                                                                |                                                                                                   |
| Jean Philippe                                     | Desilles          |                              |                         | Department of Interventional Neuroradiology          | Rothschild Foundation, Paris, France,           |                                                                |                                                                                                   |
| Malek ben                                         | Maacha            |                              |                         | Department of Interventional Neuroradiology          | Rothschild Foundation, Paris, France,           |                                                                |                                                                                                   |
|                                                   |                   |                              |                         |                                                      |                                                 |                                                                |                                                                                                   |
| Bertrand                                          | Lapergue          |                              |                         | <b><u>Foch Hospital</u></b>                          |                                                 |                                                                |                                                                                                   |
| Georges                                           | Rodesch           |                              |                         | Foch Hospital                                        |                                                 |                                                                |                                                                                                   |
| Arturo                                            | Consoli           |                              |                         | Foch Hospital                                        |                                                 |                                                                |                                                                                                   |
| Oguzhan                                           | Coskun            |                              |                         | Foch Hospital                                        |                                                 |                                                                |                                                                                                   |
| Federico                                          | Di Maria          |                              |                         | Foch Hospital                                        |                                                 |                                                                |                                                                                                   |
| Frédéric                                          | Bourdain          |                              |                         | Foch Hospital                                        |                                                 |                                                                |                                                                                                   |
| Adrien                                            | Wang              |                              |                         | Foch Hospital                                        |                                                 |                                                                |                                                                                                   |
| Maya                                              | Tchikviladze      |                              |                         | Foch Hospital                                        |                                                 |                                                                |                                                                                                   |
| Serge                                             | Evrard            |                              |                         | Foch Hospital                                        |                                                 |                                                                |                                                                                                   |
| David                                             | Weisenburger-lile |                              |                         | Foch Hospital                                        |                                                 |                                                                |                                                                                                   |
| Géraldine                                         | Buard             |                              |                         | Foch Hospital                                        |                                                 |                                                                |                                                                                                   |
| Lucas                                             | Gorza             |                              |                         | Foch Hospital                                        |                                                 |                                                                |                                                                                                   |
| Marthe                                            | Jiabe Chouakam    |                              |                         | Foch Hospital                                        |                                                 |                                                                |                                                                                                   |
|                                                   |                   |                              |                         |                                                      |                                                 |                                                                |                                                                                                   |
| Charbel                                           | Mounayer          |                              |                         | <b><u>Limoges University Hospital</u></b>            |                                                 |                                                                |                                                                                                   |
| Suzanna                                           | Saleme            |                              |                         | <b><u>Limoges University Hospital</u></b>            |                                                 |                                                                |                                                                                                   |
| Aymeric                                           | Rouchaud          |                              |                         | <b><u>Limoges University Hospital</u></b>            |                                                 |                                                                |                                                                                                   |
| Francisco                                         | Macian Montoro    |                              |                         | <b><u>Limoges University Hospital</u></b>            |                                                 |                                                                |                                                                                                   |
|                                                   |                   |                              |                         |                                                      |                                                 |                                                                |                                                                                                   |
| Vincent                                           | Costalat          |                              |                         | <b><u>Montpellier University Hospital Center</u></b> |                                                 |                                                                |                                                                                                   |
| Bonafé                                            | Alain             |                              |                         | <b><u>Montpellier University Hospital Center</u></b> |                                                 |                                                                |                                                                                                   |

## Supplemental Online Content: Nonauthor Collaborators

\*Indicates required information. Only first name, last name, and suffix will appear in PubMed.

| <b>*First Name and Middle Initial(s)</b> | <b>*Last Name</b> | <b>*Suffix (eg, Jr, III)</b> | Academic Degrees | Institution                                     | Location (city, state/province, country) | Role or Contribution, eg, chair, principal investigator | Group (if more than 1 Group listed in the byline) and/or Subgroup (eg, Steering Committee) |
|------------------------------------------|-------------------|------------------------------|------------------|-------------------------------------------------|------------------------------------------|---------------------------------------------------------|--------------------------------------------------------------------------------------------|
| Grégory                                  | Gascou            |                              |                  | <u>Montpellier University Hospital Center</u>   |                                          |                                                         |                                                                                            |
| Cyril                                    | Dargazanli        |                              |                  | <u>Montpellier University Hospital Center</u>   |                                          |                                                         |                                                                                            |
| Caroline                                 | Arquizan          |                              |                  | <u>Montpellier University Hospital Center</u>   |                                          |                                                         |                                                                                            |
|                                          |                   |                              |                  |                                                 |                                          |                                                         |                                                                                            |
| Serge                                    | Bracard           |                              |                  | <u>Nancy University Hospital Center</u>         |                                          |                                                         |                                                                                            |
| Romain                                   | Tonnelet          |                              |                  | <u>Nancy University Hospital Center</u>         |                                          |                                                         |                                                                                            |
| Anne Laure                               | Derelle           |                              |                  | <u>Nancy University Hospital Center</u>         |                                          |                                                         |                                                                                            |
| René                                     | Anxionnat         |                              |                  | <u>Nancy University Hospital Center</u>         |                                          |                                                         |                                                                                            |
| Sébastien                                | Richard           |                              |                  | <u>Nancy University Hospital Center</u>         |                                          |                                                         |                                                                                            |
| Benjamin                                 | Gory              |                              |                  | <u>Nancy University Hospital Center</u>         |                                          |                                                         |                                                                                            |
| Liang                                    | Liao              |                              |                  | <u>Nancy University Hospital Center</u>         |                                          |                                                         |                                                                                            |
| Lisa                                     | Humberjean        |                              |                  | <u>Nancy University Hospital Center</u>         |                                          |                                                         |                                                                                            |
| Gioia                                    | Mione             |                              |                  | <u>Nancy University Hospital Center</u>         |                                          |                                                         |                                                                                            |
|                                          |                   |                              |                  |                                                 |                                          |                                                         |                                                                                            |
| Hubert                                   | Desal             |                              |                  | <u>Nantes University Hospital Center</u>        |                                          |                                                         |                                                                                            |
| Romain                                   | Bourcier          |                              |                  | <u>Nantes University Hospital Center</u>        |                                          |                                                         |                                                                                            |
| B Daumas-Duport                          | Daumas-Duport     |                              |                  | <u>Nantes University Hospital Center</u>        |                                          |                                                         |                                                                                            |
| Benoit                                   | Guillon           |                              |                  | <u>Nantes University Hospital Center</u>        |                                          |                                                         |                                                                                            |
|                                          |                   |                              |                  |                                                 |                                          |                                                         |                                                                                            |
| Jérome                                   | Berge             |                              |                  | <u>Bordeaux University Hospital Center</u>      |                                          |                                                         |                                                                                            |
| Xavier                                   | Barreau           |                              |                  | <u>Bordeaux University Hospital Center</u>      |                                          |                                                         |                                                                                            |
| Gauthier                                 | Margnat           |                              |                  | <u>Bordeaux University Hospital Center</u>      |                                          |                                                         |                                                                                            |
| Igor                                     | Sibon             |                              |                  | <u>Bordeaux University Hospital Center</u>      |                                          |                                                         |                                                                                            |
|                                          |                   |                              |                  |                                                 |                                          |                                                         |                                                                                            |
| Lynda                                    | Djemmane          |                              |                  | <u>Department of Biostatistics, Univ. Lille</u> |                                          |                                                         |                                                                                            |
| Julien                                   | Labreuche         |                              |                  | <u>Department of Biostatistics, Univ. Lille</u> |                                          |                                                         |                                                                                            |
| Alain                                    | Duhamel           |                              |                  | <u>Department of Biostatistics, Univ. Lille</u> |                                          |                                                         |                                                                                            |
|                                          |                   |                              |                  |                                                 |                                          |                                                         |                                                                                            |
|                                          |                   |                              |                  |                                                 |                                          |                                                         |                                                                                            |
| Frederic                                 | Clarencon         |                              |                  | <u>Pitie Salpetriere</u>                        |                                          |                                                         |                                                                                            |
| Eimad                                    | Shotar            |                              |                  | <u>Pitie Salpetriere</u>                        |                                          |                                                         |                                                                                            |
| Charlotte                                | Rosso             |                              |                  | <u>Pitie Salpetriere</u>                        |                                          |                                                         |                                                                                            |

Supplemental Online Content: Nonauthor Collaborators

\*Indicates required information. Only first name, last name, and suffix will appear in PubMed.

| *First Name and Middle Initial(s) | *Last Name | *Suffix (eg, Jr, III) | Academic Degrees | Institution              | Location (city, state/province, country) | Role or Contribution, eg, chair, principal investigator | Group (if more than 1 Group listed in the byline) and/or Subgroup (eg, Steering Committee) |
|-----------------------------------|------------|-----------------------|------------------|--------------------------|------------------------------------------|---------------------------------------------------------|--------------------------------------------------------------------------------------------|
| Nader-Antoine                     | Sourour    |                       |                  | <u>Pitie Salpetriere</u> |                                          |                                                         |                                                                                            |
| Stéphanie                         | Lenck      |                       |                  | <u>Pitie Salpetriere</u> |                                          |                                                         |                                                                                            |
| Kevin                             | Premat     |                       |                  | <u>Pitie Salpetriere</u> |                                          |                                                         |                                                                                            |
| Sonia                             | Alamowitch |                       |                  | <u>Pitie Salpetriere</u> |                                          |                                                         |                                                                                            |
|                                   |            |                       |                  |                          |                                          |                                                         |                                                                                            |
| Laurent                           | Spelle     |                       |                  | <u>Kremlin Bicêtre</u>   |                                          |                                                         |                                                                                            |
| Christian                         | denier     |                       |                  | <u>Kremlin Bicêtre</u>   |                                          |                                                         |                                                                                            |
|                                   |            |                       |                  |                          |                                          |                                                         |                                                                                            |
| Francois                          | Eugene     |                       |                  | <u>Rennes</u>            |                                          |                                                         |                                                                                            |
| Stephane                          | Vannier    |                       |                  | <u>Rennes</u>            |                                          |                                                         |                                                                                            |
