# Supplementary material
Source: PubMed Central journal article supplement (PMC8479584)
Supplement: jama-e2113827-s005.pdf [file jama-e2113827-s005.pdf]

## **Data Sharing Statement**

### **Data**

**Data available:** Yes

**Data types:** Deidentified participant data

**How to access data:** b.lapergue@hopital-foch.com

**When available:** With publication

### **Supporting Documents**

**Document types:** Statistical/analytic code

**How to access documents:** b.lapergue@hopital-foch.com

**When available:** With publication

### **Additional Information**

**Who can access the data:** none

**Types of analyses:** none

**Mechanisms of data availability:** after approval of a proposal by the steering Committee
